# Supplementary material for: Identification of a putative competitive endogenous RNA network for lung adenocarcinoma using TCGA datasets
Source: PeerJ journal article supplement (doi:10.7717/peerj.6809), 2019-04-23

A

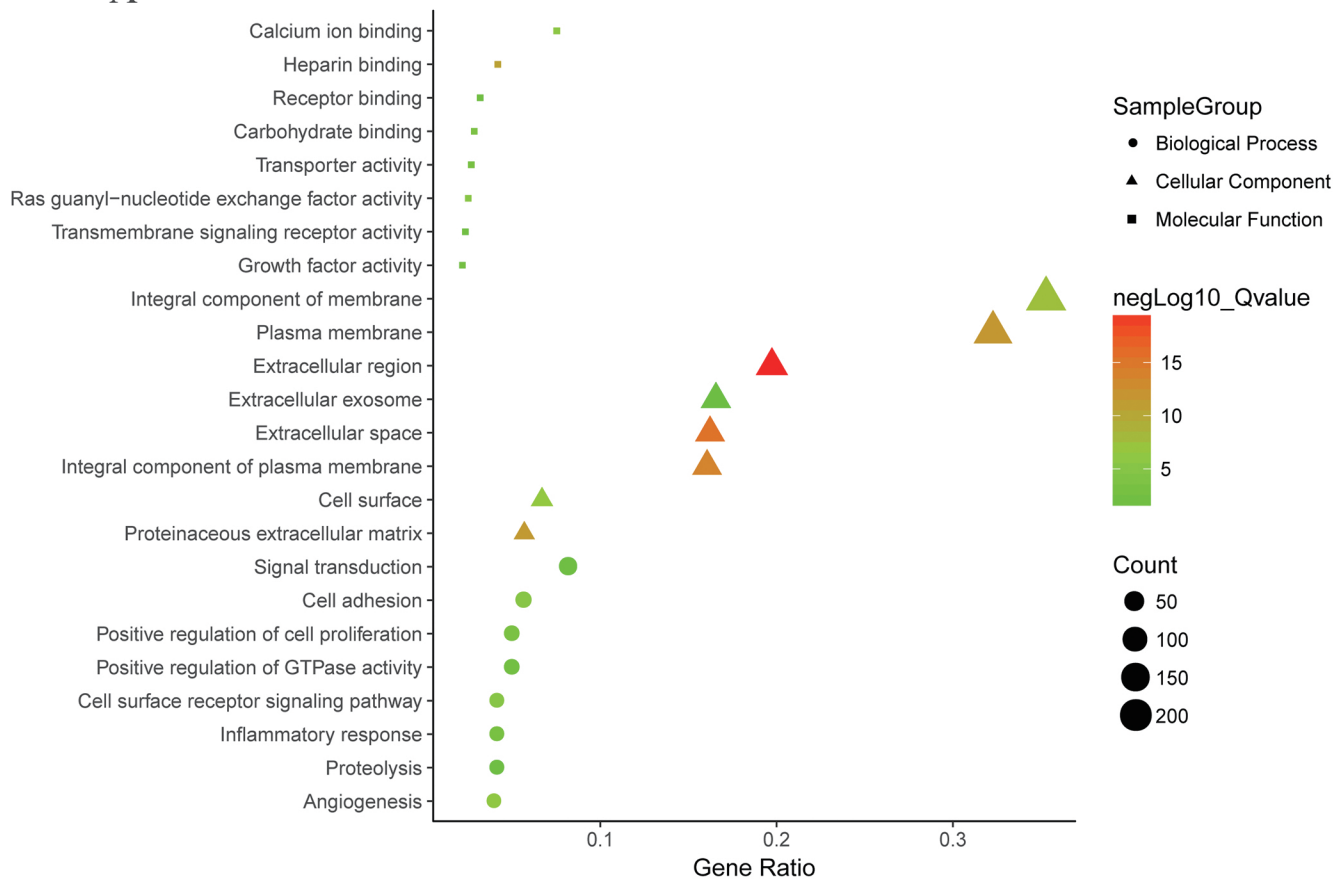

B

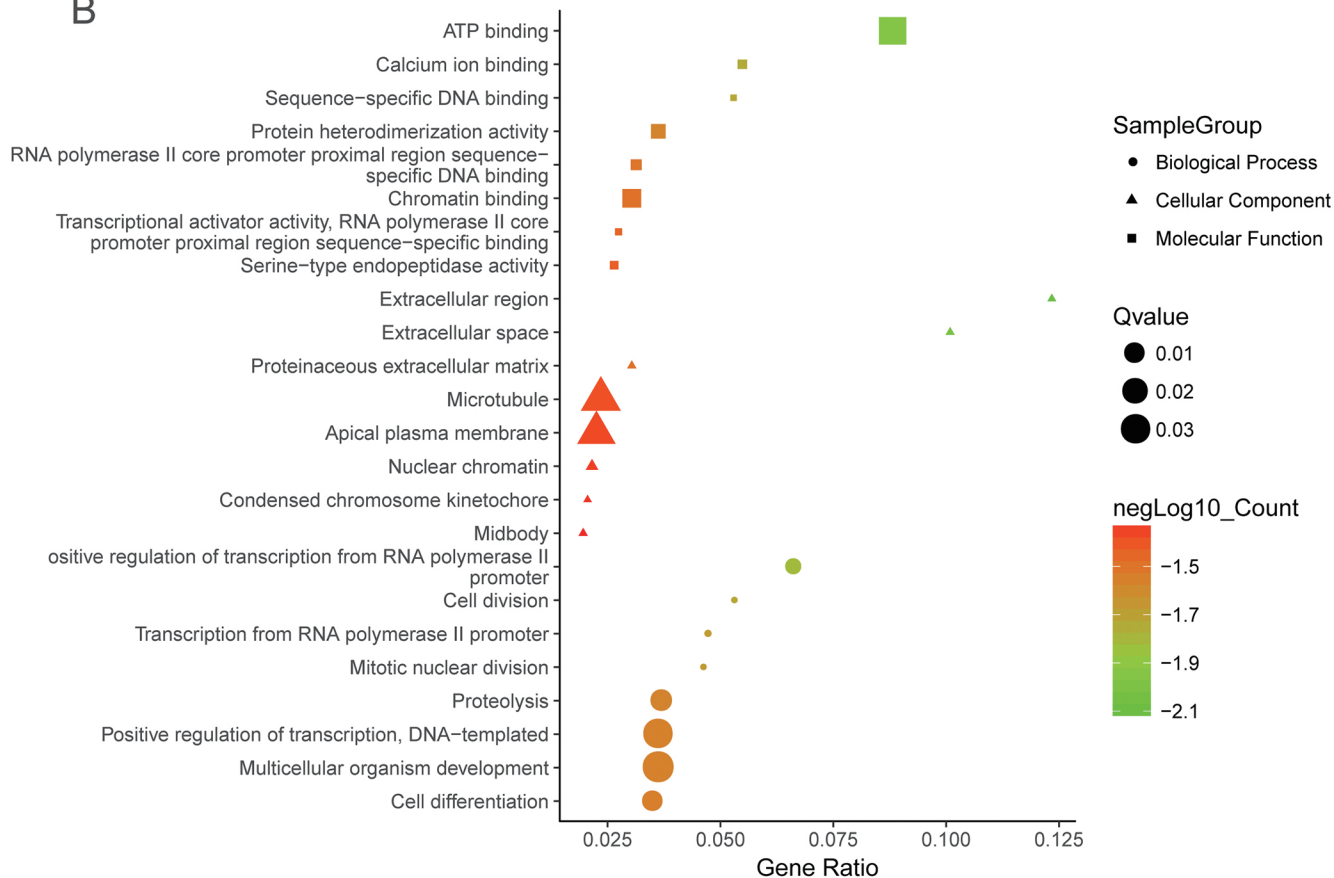

Supplement: Figs1.pdf [file Figs1.pdf]
